# Supplementary material for: 2020 Clinical Practice Guideline for Percutaneous Transthoracic Needle Biopsy of Pulmonary Lesions: A Consensus Statement and Recommendations of the Korean Society of Thoracic Radiology
Source: PubMed Central journal article supplement — Korean J Radiol. 2020 Nov 19;22(2):263–80. doi: 10.3348/kjr.2020.0137 (PMC7817630; doi:10.3348/kjr.2020.0137), 2020-11-19

## Supplemental Figures

### Supplemental Figure 1. Diagram for the inclusion of guidelines for key questions 1 to 4

#### Key question 1. What are the indications for PTNB for lung lesions?

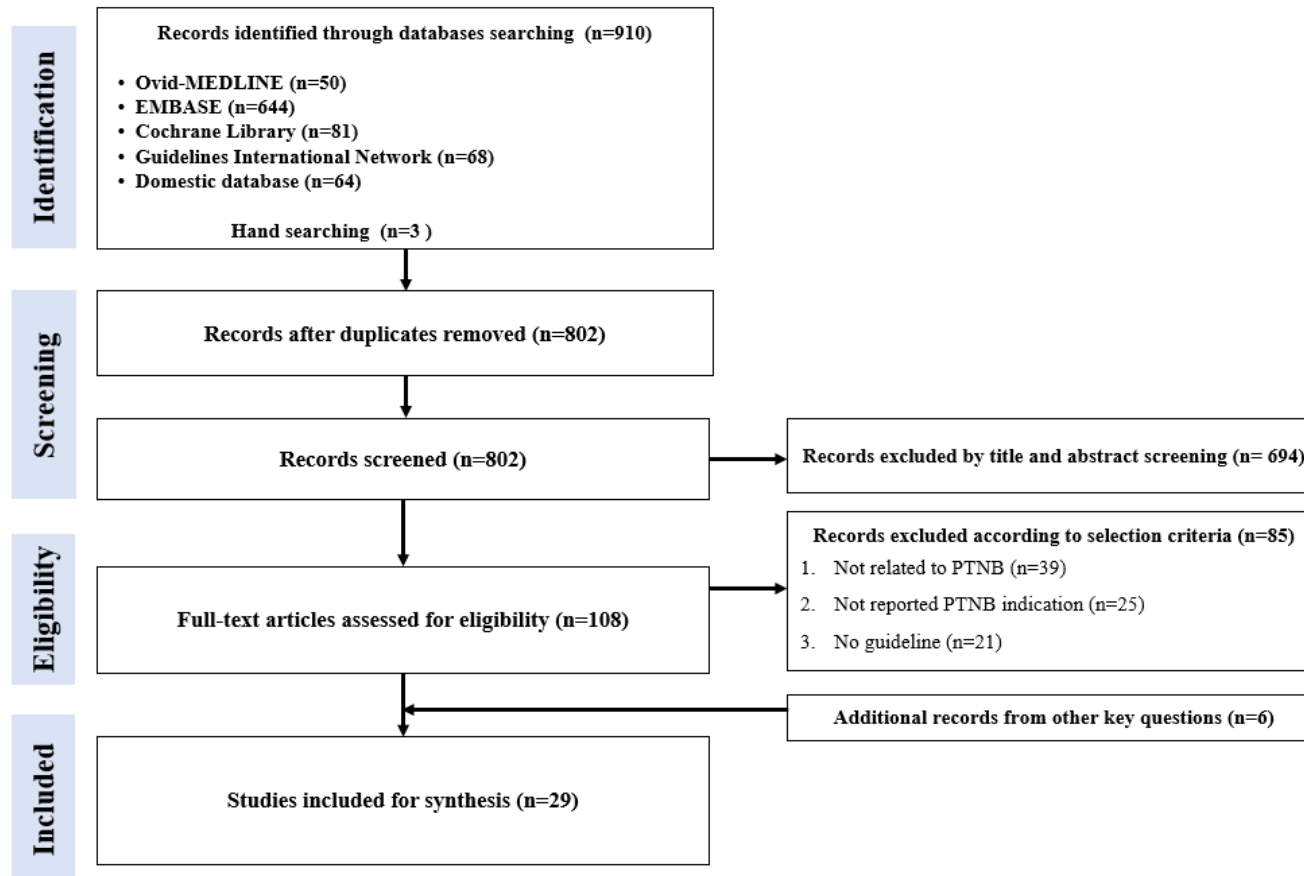

**Key question 2. What is the appropriate laboratory and imaging evaluation for patients before PTNB?**

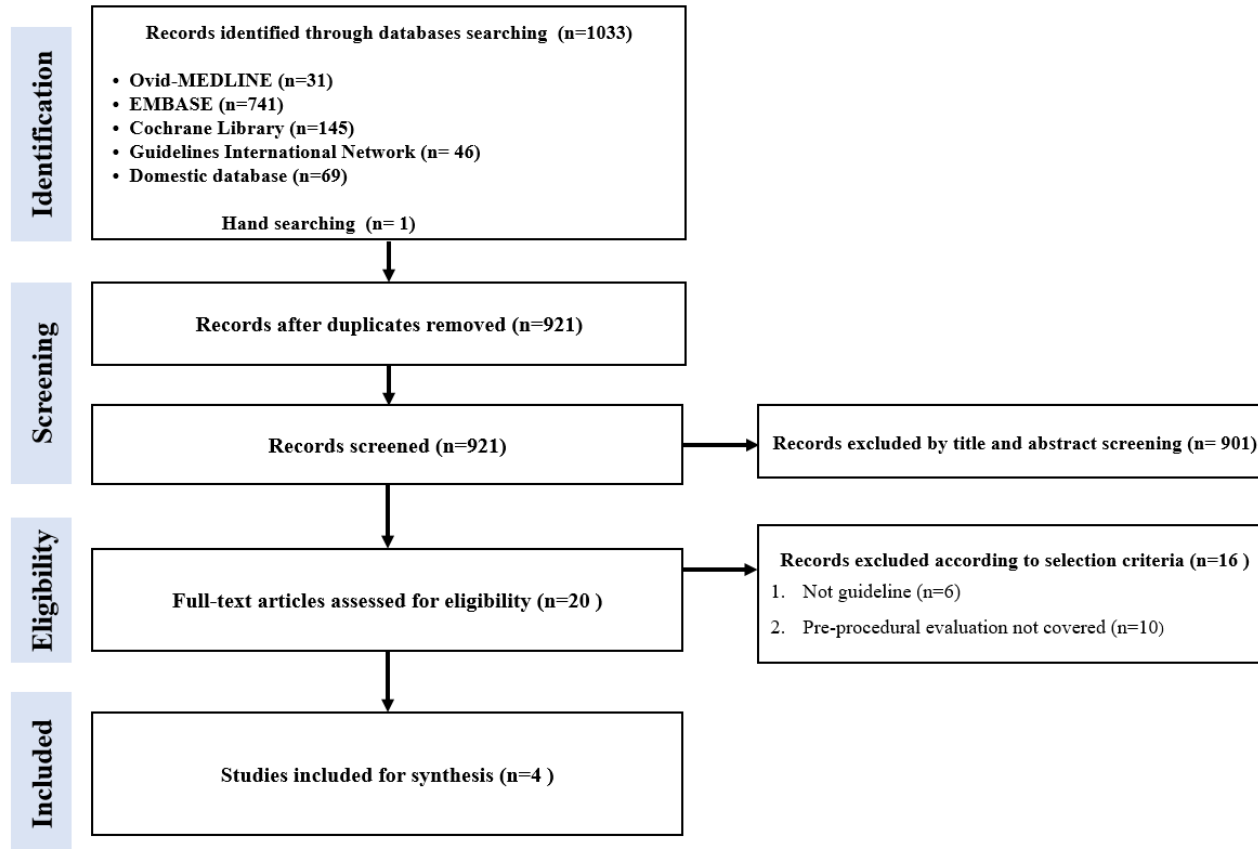

### Key question 3. What is the appropriate method for PTNB of lung lesions?

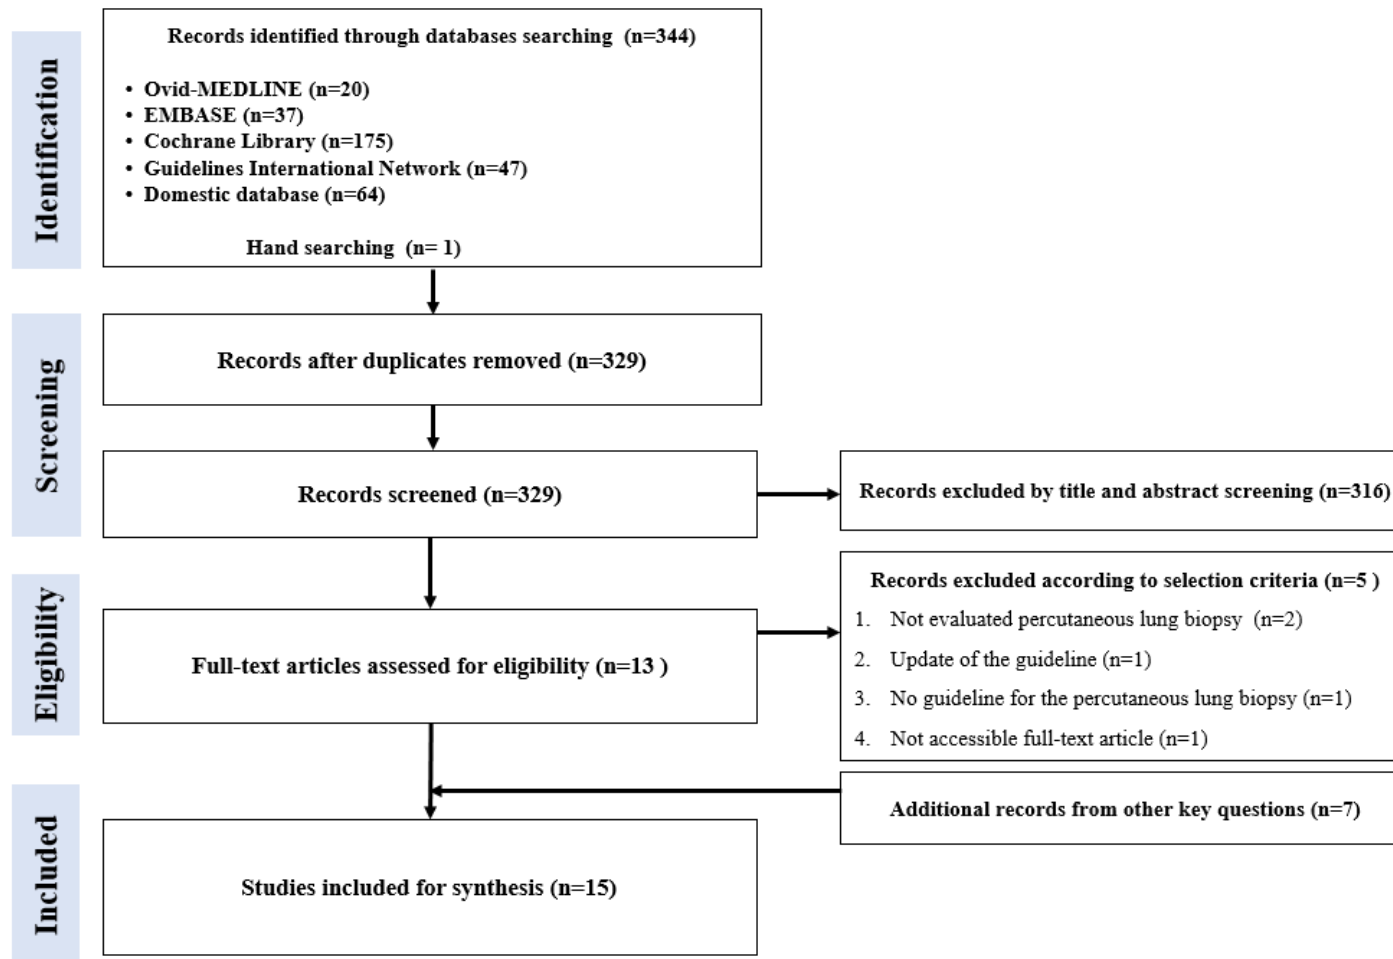

#### Key question 4. What is the appropriate management of acute PTNB-related complications?

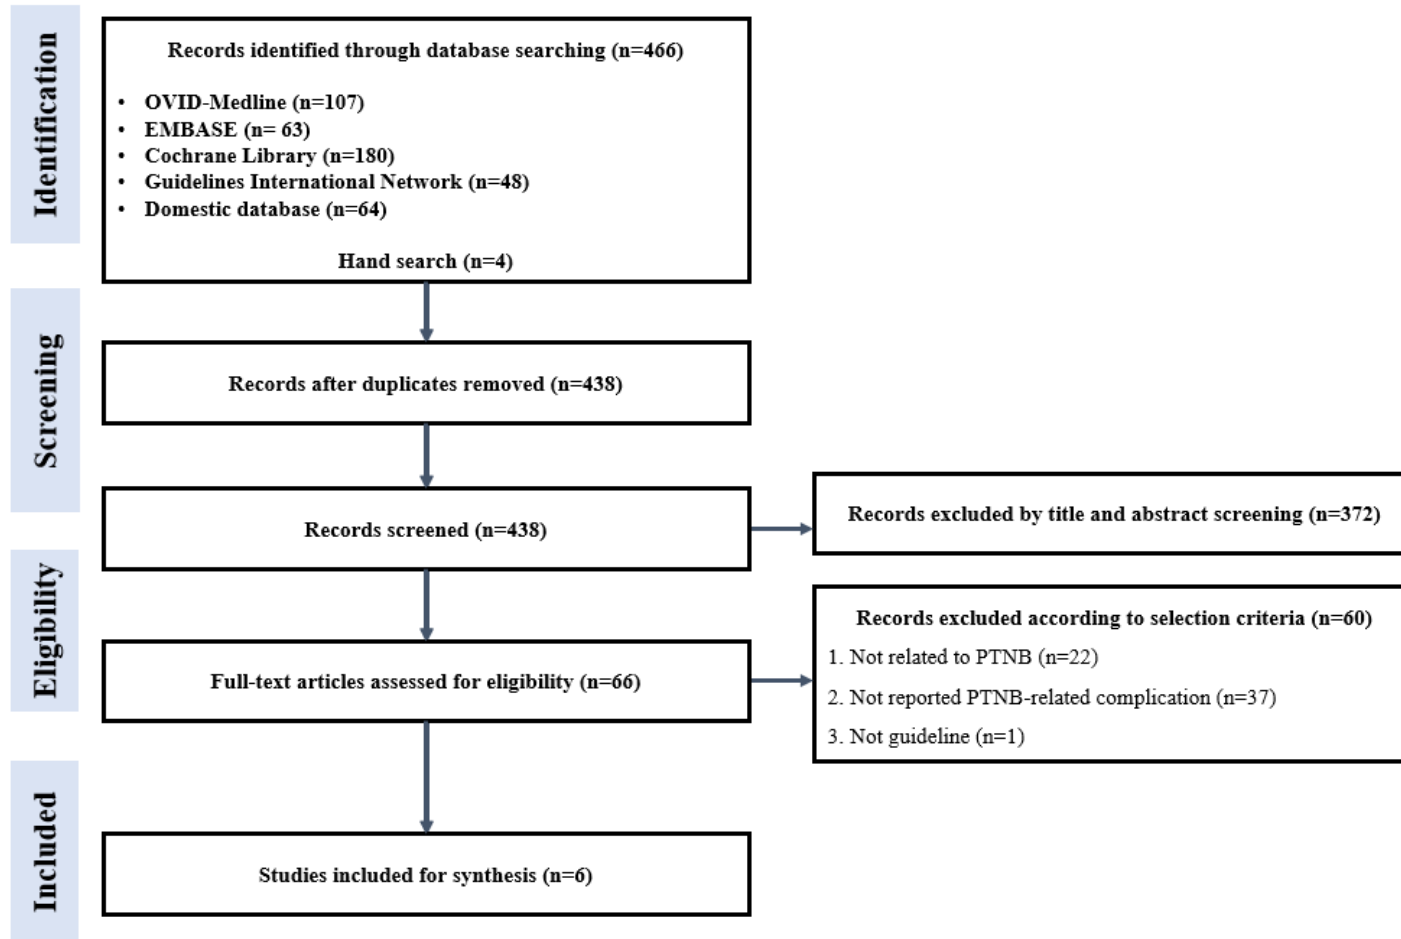

Supplement: kjr-22-263-s001.pdf [file kjr-22-263-s001.pdf]
