# Supplementary material for: 2020 Clinical Practice Guideline for Percutaneous Transthoracic Needle Biopsy of Pulmonary Lesions: A Consensus Statement and Recommendations of the Korean Society of Thoracic Radiology
Source: PubMed Central journal article supplement — Korean J Radiol. 2020 Nov 19;22(2):263–80. doi: 10.3348/kjr.2020.0137 (PMC7817630; doi:10.3348/kjr.2020.0137), 2020-11-19

Supplemental Figure 2. Pooled sensitivity (A) and specificity (B) of percutaneous transthoracic needle biopsy in 2-by-2 (excluding biopsy cases of insufficient specimen from analysis) and 3-by-2 tables (deciding biopsy cases of insufficient specimen as diagnostic failure)

(A) Pooled sensitivity

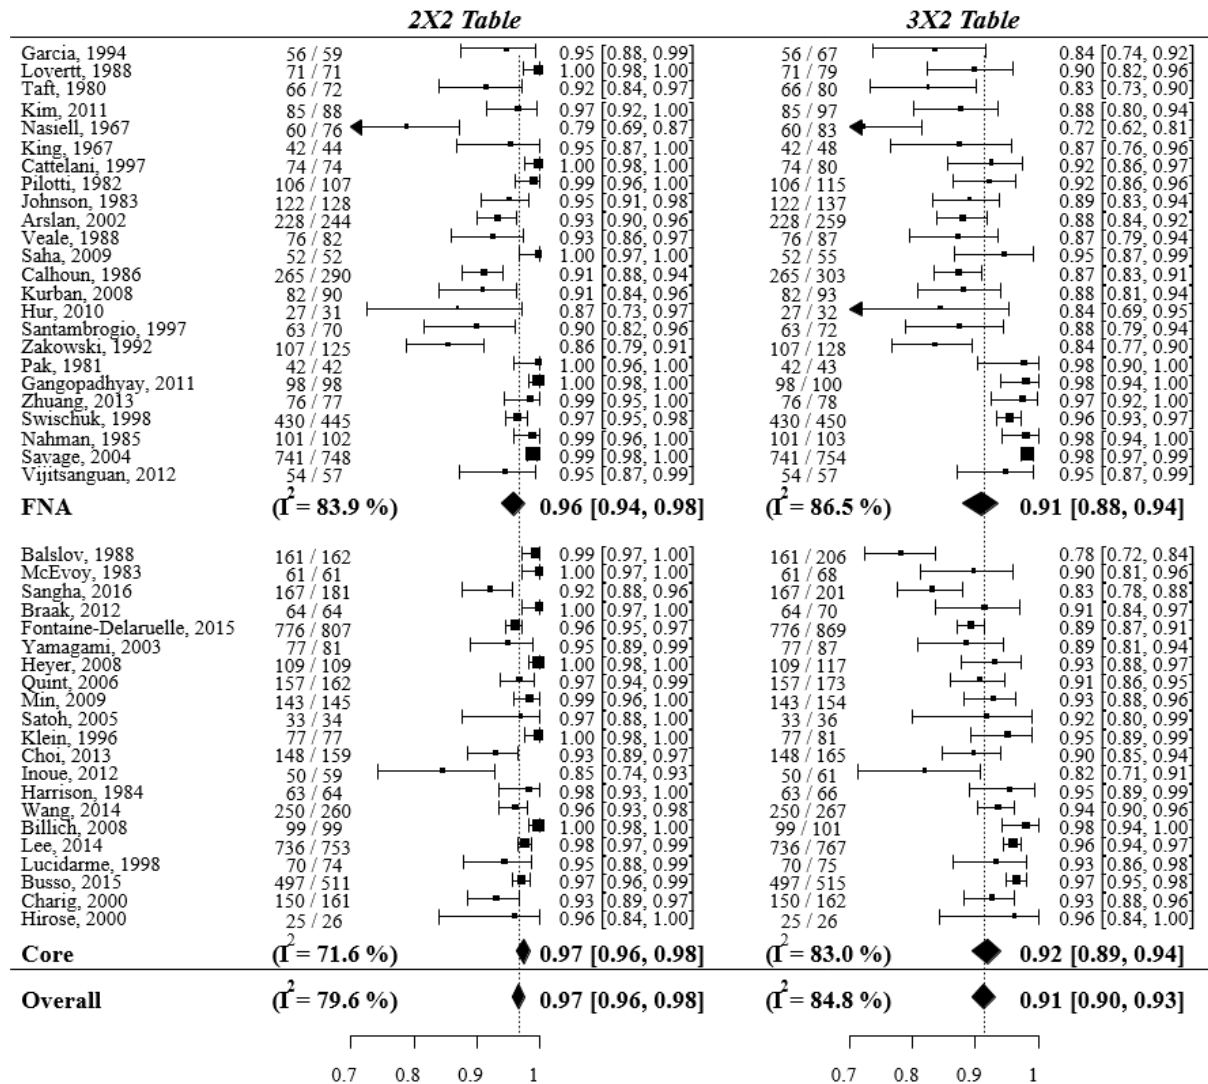

**(B) Pooled specificity**

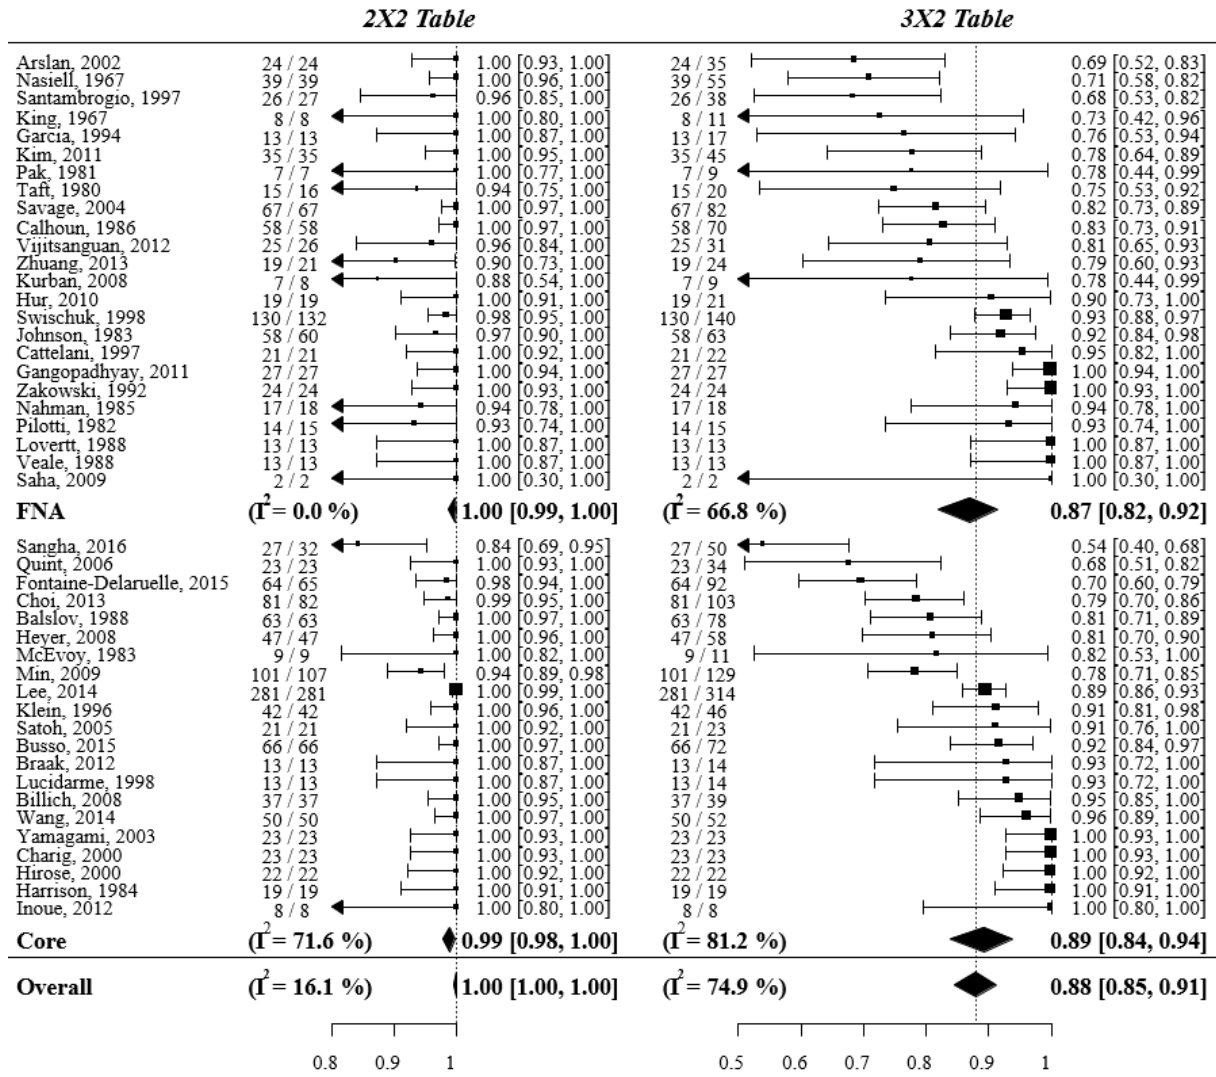

Supplement: kjr-22-263-s002.pdf [file kjr-22-263-s002.pdf]
