# Supplementary material for: 2020 Clinical Practice Guideline for Percutaneous Transthoracic Needle Biopsy of Pulmonary Lesions: A Consensus Statement and Recommendations of the Korean Society of Thoracic Radiology
Source: PubMed Central journal article supplement — Korean J Radiol. 2020 Nov 19;22(2):263–80. doi: 10.3348/kjr.2020.0137 (PMC7817630; doi:10.3348/kjr.2020.0137), 2020-11-19
Supplement: kjr-22-263-s003.pdf [file kjr-22-263-s003.pdf]

**Supplemental Tables**

**Supplemental Table 1. Name, affiliation, and role of researchers**

| Name           | Role                          |                          |                                 |                   |                                                               |                               |                     |
|----------------|-------------------------------|--------------------------|---------------------------------|-------------------|---------------------------------------------------------------|-------------------------------|---------------------|
|                | Conceptualization and funding | Generating key questions | Literature search and selection | Quality Appraisal | Drafting the recommendation and grading the level of evidence | Finalizing the Recommendation | Manuscript drafting |
| Soon Ho Yoon   | Major                         | Major                    | Major                           | Major             | Major                                                         | Major                         | Major               |
| Sang Min Lee   | No                            | Major                    | Major                           | Major             | Major                                                         | Major                         | Major               |
| Chul Hwan Park | No                            | Major                    | Major                           | Major             | Major                                                         | Major                         | Major               |
| Jong Hyuk Lee  | No                            | Major                    | Major                           | Major             | Major                                                         | Major                         | Major               |
| Hyung Jin Kim  | No                            | Major                    | Major                           | Major             | Major                                                         | Major                         | Major               |
| Kum Ju Chae    | No                            | Major                    | Major                           | Major             | Major                                                         | Major                         | Major               |
| Kwang Nam Jin  | No                            | Major                    | Major                           | Major             | Major                                                         | Major                         | Major               |
| Kyung Hee Lee  | No                            | Major                    | Major                           | Major             | Major                                                         | Major                         | Major               |
| Jung Im Kim    | No                            | Major                    | Major                           | Major             | Major                                                         | Major                         | Major               |
| Jung Hee Hong  | No                            | Major                    | Major                           | Major             | Major                                                         | Major                         | Major               |
| Eui Jin Hwang  | No                            | Major                    | Major                           | Major             | Major                                                         | Major                         | Major               |
| Hee Kyung Kim  | No                            | Major                    | Major                           | Major             | Major                                                         | Major                         | Major               |

|                |       |       |       |       |       |       |       |
|----------------|-------|-------|-------|-------|-------|-------|-------|
| Young Joo Suh  | No    | Major | Major | Major | Major | Major | Major |
| Samina Park    | No    | Minor | No    | No    | No    | Minor | Minor |
| Young Sik Park | No    | Minor | No    | No    | No    | Minor | Minor |
| Dong-Wan Kim   | No    | Minor | No    | No    | No    | Minor | Minor |
| Miyoung Choi   | No    | Major | Minor | Minor | Minor | Minor | Minor |
| Chang Min Park | Major | Major | Major | Major | Minor | Major | Major |
