# Supplementary material for: 2020 Clinical Practice Guideline for Percutaneous Transthoracic Needle Biopsy of Pulmonary Lesions: A Consensus Statement and Recommendations of the Korean Society of Thoracic Radiology
Source: PubMed Central journal article supplement — Korean J Radiol. 2020 Nov 19;22(2):263–80. doi: 10.3348/kjr.2020.0137 (PMC7817630; doi:10.3348/kjr.2020.0137), 2020-11-19
Supplement: kjr-22-263-s004.pdf [file kjr-22-263-s004.pdf]

## Supplemental table 2. Detailed search strategy for key questions

### 1) What are the indications for PTNB for lung lesions?

#### Ovid MEDLINE (R) 1946 to present with daily update

| N | Search term                                                                   | Search result |
|---|-------------------------------------------------------------------------------|---------------|
| 1 | exp Lung Neoplasms/ AND exp Biopsy, Needle/                                   | 4110          |
| 2 | ((lung or pulmo\$ or thora\$ ) and (nodule\$ or mass or tumo?r)).mp.          | 199010        |
| 3 | ((aspiration or needle or biopsy) and (percutaneous or diagnos\$)).tw.        | 147825        |
| 4 | 1 OR (2 AND 3)                                                                | 11400         |
| 5 | (guideline\$ or recommendation\$).ti. or (practice guideline or guideline).pt | 101265        |
| 6 | 4 AND 5                                                                       | 50            |

#### Embase

| N | Search term                                                                                                         | Search result |
|---|---------------------------------------------------------------------------------------------------------------------|---------------|
| 1 | ('lung nodule'/exp OR 'lung tumor'/exp) AND ('needle biopsy'/exp OR biopsy/exp)                                     | 38275         |
| 2 | ((lung OR pulmo* OR thora*) AND (nodule* OR mass OR tumo?r OR percutaneous OR 'needle biopsy' OR aspiration)):ab,ti | 139445        |
| 3 | 1 OR 2                                                                                                              | 163923        |
| 4 | guideline*:ti OR recommendation*:ti                                                                                 | 129471        |
| 5 | 3 and 13                                                                                                            | 644           |

#### Guidelines International Network

| N | Search term                                                                                       | Search result |
|---|---------------------------------------------------------------------------------------------------|---------------|
| 1 | "lung cancer"                                                                                     | 41            |
| 2 | Needle Biopsy                                                                                     | 2             |
| 3 | lung and nodule                                                                                   | 1             |
| 4 | lung and mass                                                                                     | 3             |
| 5 | precision medicine or mutation                                                                    | 1             |
| 6 | subsolid or part-solid or "ground glass" or repeat or rebiopsy or molecular or "targeted therapy" | 23            |
| 7 | Removal of duplicated items                                                                       | 68            |

#### Cochrane Library

| N | Search term                                         | Search result |
|---|-----------------------------------------------------|---------------|
| 1 | MeSH descriptor: [Lung Neoplasms] explode all trees | 6501          |
| 2 | MeSH descriptor: [Biopsy, Needle] explode all trees | 1130          |

|    |                                                                                                 |       |
|----|-------------------------------------------------------------------------------------------------|-------|
| 3  | #1 and #2                                                                                       | 45    |
| 4  | (lung or pulmo* or thora*) and (nodule* or mass or tumo?r)                                      | 5760  |
| 5  | ((aspiration or needle or biopsy) and (percutaneous or diagnos*))                               | 10665 |
| 6  | #3 or (#4 and #5)                                                                               | 410   |
| 7  | (subsolid or part-solid or ground glass or repeat or rebiopsy or molecular or targeted therapy) | 35593 |
| 8  | MeSH descriptor: [Precision Medicine] explode all trees                                         | 332   |
| 9  | MeSH descriptor: [Precision Medicine] explode all trees                                         | 2096  |
| 10 | (#8 or #9) or #7                                                                                | 37603 |
| 11 | #6 and #10                                                                                      | 117   |
| 12 | (guideline* or recommendation*) or (practice guideline or guideline)                            | 41616 |
| 13 | #11 and #12                                                                                     | 81    |
| 14 | Removal of duplicated items                                                                     | 81    |

#### KoreaMed

| N | Search term                                         | Search result |
|---|-----------------------------------------------------|---------------|
| 1 | pulmonary [ALL] and mass [ALL] and guideline [ALL]  | 3             |
| 2 | pulmonary [ALL] and tumor [ALL] and guideline [ALL] | 1             |
| 3 | "lung cancer" [ALL] and guideline [ALL]             | 17            |
| 4 | Sum                                                 | 21            |
| 5 | Removal of duplicated items                         | 20            |

#### KMBASE

|   |                                                 |    |
|---|-------------------------------------------------|----|
| 1 | [ALL=pulmonary nodule] AND [ALL=guideline]      | 4  |
| 2 | [ALL=pulmonary nodule] AND [ALL=recommendation] | 0  |
| 3 | [ALL=lung cancer] AND [ALL=guideline]           | 46 |
| 4 | Sum                                             | 50 |
| 5 | Removal of duplicated items                     | 49 |

#### KoMGI

| N | Title of guideline                    | Year |
|---|---------------------------------------|------|
| 1 | * 폐암 진료지침                             | 2010 |
| 2 | * 저선량 CT를 이용한 폐암 검진 : 대한흉부영상의학회 의견 제안 | 2012 |

## 2) Which laboratory and imaging evaluations are appropriate for patients before PTNB?

### Ovid MEDLINE (R) 1946 to present with daily update

| N  | Search term                                                                   | Search result |
|----|-------------------------------------------------------------------------------|---------------|
| 1  | exp Biopsy, Needle/ AND exp Lung Neoplasms/                                   | 4082          |
| 2  | ((lung or pulmo\$ or thora\$ ) and (nodule\$ or mass or tumo?r)).mp.          | 196537        |
| 3  | ((aspiration or needle or biopsy) and (percutaneous or diagnos\$)).tw.        | 145103        |
| 4  | 1 OR (2 AND 3)                                                                | 11268         |
| 5  | (imaging or radiolog\$ or radiograp\$ or laboratory).tw                       | 1231366       |
| 6  | exp Tomography, X-Ray Computed/ or CT.mp                                      | 486703        |
| 7  | ((chest OR pulmo\$) AND CT).mp                                                | 32280         |
| 8  | OR/5-7                                                                        | 1562030       |
| 9  | 4 AND 8                                                                       | 5852          |
| 10 | (guideline\$ or recommendation\$).ti. or (practice guideline or guideline).pt | 99976         |
| 11 | 9 AND 10                                                                      | 31            |

### Embase

| N  | Search term                                                                                                         | Search result |
|----|---------------------------------------------------------------------------------------------------------------------|---------------|
| 1  | ('lung nodule'/exp OR 'lung tumor'/exp) AND ('needle biopsy'/exp OR biopsy/exp)                                     | 37548         |
| 2  | ((lung OR pulmo* OR thora*) AND (nodule* OR mass OR tumo?r OR percutaneous OR 'needle biopsy' OR aspiration)):ab,ti | 137240        |
| 3  | 1 OR 2                                                                                                              | 161207        |
| 4  | (coagulation or bleeding tendency or pulmonary function):ab,ti                                                      | 110003        |
| 5  | (preprocedural or preparation or platelet):ab,ti                                                                    | 594465        |
| 6  | 3 OR 4 OR 5                                                                                                         | 850445        |
| 7  | (imaging or radiolog* or radiograp* or laboratory):ab,ti                                                            | 1965761       |
| 8  | 'computer assisted tomography'/exp or 'laboratory test'/exp or CT:ab,ti                                             | 1227893       |
| 9  | ((chest OR pulmo\$) AND CT):ab,ti                                                                                   | 17862         |
| 10 | radiodiagnosis/exp                                                                                                  | 2540329       |
| 11 | OR/7-10                                                                                                             | 3771009       |
| 12 | 6 AND 11                                                                                                            | 164176        |
| 13 | guideline*:ti OR recommendation*:ti                                                                                 | 127478        |
| 14 | 12 and 13                                                                                                           | 741           |

### Guidelines International Network

| N | Search term                 | Search result |
|---|-----------------------------|---------------|
| 1 | "lung cancer"               | 41            |
| 2 | Needle Biopsy               | 2             |
| 3 | lung and nodule             | 1             |
| 4 | lung and mass               | 3             |
| 5 | Removal of duplicated items | 46            |

### Cochrane Library

| N  | Search term                                                          | Search result |
|----|----------------------------------------------------------------------|---------------|
| 1  | MeSH descriptor: [Lung Neoplasms] explode all trees                  | 6501          |
| 2  | MeSH descriptor: [Biopsy, Needle] explode all trees                  | 1130          |
| 3  | #1 and #2                                                            | 45            |
| 4  | (lung or pulmo* or thora*) and (nodule* or mass or tumor?)           | 5760          |
| 5  | ((aspiration or needle or biopsy) and (percutaneous or diagnos*))    | 10665         |
| 6  | #3 or (#4 and #5)                                                    | 410           |
| 7  | (imaging or radiolog\$ or radiograp\$ or laboratory)                 | 117164        |
| 8  | Tomography, X-Ray Computed or CT                                     | 97597         |
| 9  | ((chest or pulmo*) and CT)                                           | 5781          |
| 10 | #7 or #8 or #9                                                       | 196373        |
| 11 | #6 and #10                                                           | 295           |
| 12 | (guideline* or recommendation*) or (practice guideline or guideline) | 41616         |
| 13 | #11 and #12                                                          | 145           |
| 14 | Removal of duplicated items                                          | 145           |

### KoreaMed

| N | Search term                                         | Search result |
|---|-----------------------------------------------------|---------------|
| 1 | pulmonary [ALL] and mass [ALL] and guideline [ALL]  | 3             |
| 2 | pulmonary [ALL] and tumor [ALL] and guideline [ALL] | 1             |
| 3 | "lung cancer" [ALL] and guideline [ALL]             | 17            |
| 4 | Sum                                                 | 21            |
| 5 | Removal of duplicated items                         | 20            |

### KMBASE

|   |                                                 |    |
|---|-------------------------------------------------|----|
| 1 | [ALL=pulmonary nodule] AND [ALL=guideline]      | 4  |
| 2 | [ALL=pulmonary nodule] AND [ALL=recommendation] | 0  |
| 3 | [ALL=lung cancer] AND [ALL=guideline]           | 46 |

|   |                             |    |
|---|-----------------------------|----|
| 4 | Sum                         | 50 |
| 5 | Removal of duplicated items | 49 |

**KoMGI**

| N | Title of guideline                    | Year |
|---|---------------------------------------|------|
| 1 | * 폐암 진료지침                             | 2010 |
| 2 | * 저선량 CT를 이용한 폐암 검진 : 대한흉부영상의학회 의견 제안 | 2012 |

### 3) What are the appropriate techniques for PTNB of lung lesions?

#### Ovid MEDLINE (R) 1946 to present with daily update

| N | Search term                                                                             | Search result |
|---|-----------------------------------------------------------------------------------------|---------------|
| 1 | exp Lung Neoplasms/AND exp Biopsy, Needle/                                              | 4082          |
| 2 | ((pulmo\$ OR thora\$) AND (nodule\$ OR percutaneous OR aspiration OR biopsy OR needle)) | 53192         |
| 3 | (diagnostic accuracy or sensitivity or specificity).mp                                  | 1449803       |
| 4 | (1 OR 2) AND 3                                                                          | 4642          |
| 5 | (guideline\$ or recommendation\$).ti. or (practice guideline or guideline).pt           | 99,976        |
| 6 | 4 AND 5                                                                                 | 20            |

#### Embase

| N | Search term                                                                                                         | Search result |
|---|---------------------------------------------------------------------------------------------------------------------|---------------|
| 1 | ('lung nodule'/exp OR 'lung tumor'/exp) AND ('needle biopsy'/exp OR biopsy/exp)                                     | 33215         |
| 2 | ((lung OR pulmo* OR thora*) AND (nodule* OR mass OR tumo?r OR percutaneous OR 'needle biopsy' OR aspiration)):ab,ti | 137224        |
| 3 | 1 OR 2                                                                                                              | 158555        |
| 4 | ('diagnostic accuracy' or sensitivity or specificity):ab,ti                                                         | 1178839       |
| 5 | 3 AND 4                                                                                                             | 10106         |
| 6 | guideline*:ti OR recommendation*:ti                                                                                 | 127463        |
| 7 | 5 AND 6                                                                                                             | 37            |

#### Guidelines International Network

| N | Search term                                         | Search result |
|---|-----------------------------------------------------|---------------|
| 1 | "lung cancer"                                       | 41            |
| 2 | Needle Biopsy                                       | 2             |
| 3 | lung and nodule                                     | 1             |
| 4 | lung and mass                                       | 3             |
| 5 | (diagnostic accuracy or sensitivity or specificity) | 1             |
| 6 | Removal of duplicated items                         | 47            |

#### Cochrane Library

| N | Search term                                         | Search result |
|---|-----------------------------------------------------|---------------|
| 1 | MeSH descriptor: [Lung Neoplasms] explode all trees | 6501          |
| 2 | MeSH descriptor: [Biopsy, Needle] explode all trees | 1130          |
| 3 | #1 and #2                                           | 45            |

|    |                                                                      |       |
|----|----------------------------------------------------------------------|-------|
| 4  | (lung or pulmo* or thora*) and (nodule* or mass or tumo?r)           | 5760  |
| 5  | ((aspiration or needle or biopsy) and (percutaneous or diagnos*))    | 10665 |
| 6  | #3 or (#4 and #5)                                                    | 410   |
| 7  | (diagn* accuracy or sensitivity or specificity)                      | 80034 |
| 8  | #6 and #7                                                            | 595   |
| 9  | (guideline* or recommendation*) or (practice guideline or guideline) | 51823 |
| 10 | #8 and #9                                                            | 416   |
| 11 | Removal of duplicated items                                          | 416   |

#### KoreaMED

| N | Search term                                         | Search result |
|---|-----------------------------------------------------|---------------|
| 1 | pulmonary [ALL] and mass [ALL] and guideline [ALL]  | 3             |
| 2 | pulmonary [ALL] and tumor [ALL] and guideline [ALL] | 1             |
| 3 | "lung cancer" [ALL] and guideline [ALL]             | 17            |
| 4 | Sum                                                 | 21            |
| 5 | Removal of duplicated items                         | 20            |

#### KMBASE

|   |                                                 |    |
|---|-------------------------------------------------|----|
| 1 | [ALL=pulmonary nodule] AND [ALL=guideline]      | 4  |
| 2 | [ALL=pulmonary nodule] AND [ALL=recommendation] | 0  |
| 3 | [ALL=lung cancer] AND [ALL=guideline]           | 46 |
| 4 | Sum                                             | 50 |
| 5 | Removal of duplicated items                     | 49 |

#### KoMGI

| N | Title of guideline                    | Year |
|---|---------------------------------------|------|
| 1 | * 폐암 진료지침                             | 2010 |
| 2 | * 저선량 CT를 이용한 폐암 검진 : 대한흉부영상의학회 의견 제안 | 2012 |

#### 4) What is the appropriate management of acute PTNB-related complications?

##### Ovid MEDLINE (R) 1946 to present with daily update

| N | Search term                                                                                           | Search result |
|---|-------------------------------------------------------------------------------------------------------|---------------|
| 1 | exp Lung Neoplasms/ AND exp Biopsy, Needle/                                                           | 4082          |
| 2 | ((pulmo\$ OR thora\$) AND (nodule\$ or percutaneous OR aspiration OR biopsy OR needle)).mp            | 53192         |
| 3 | (manage\$ or observ\$ or hemoptysis OR air embolism OR hemothorax OR pneumothorax OR complication).mp | 3957072       |
| 4 | (1 OR 2) AND 3                                                                                        | 16088         |
| 5 | (guideline\$ or recommendation\$).ti. or (practice guideline or guideline).pt                         | 99,976        |
| 6 | 4 AND 5                                                                                               | 107           |

##### Embase

| N | Search term                                                                                                         | Search result |
|---|---------------------------------------------------------------------------------------------------------------------|---------------|
| 1 | ('lung nodule'/exp OR 'lung tumor'/exp) AND ('needle biopsy'/exp OR biopsy/exp)                                     | 37538         |
| 2 | ((lung OR pulmo* OR thora*) AND (nodule* OR mass OR tumo?r OR percutaneous OR 'needle biopsy' OR aspiration)):ab,ti | 137240        |
| 3 | 1 OR 2                                                                                                              | 161207        |
| 4 | (manage\$ or observ\$ or hemoptysis OR 'air embolism' OR hemothorax OR pneumothorax OR complication):ab,ti          | 924323        |
| 5 | 3 AND 4                                                                                                             | 15629         |
| 6 | guideline*:ti OR recommendation*:ti                                                                                 | 127,478       |
| 7 | 5 AND 6                                                                                                             | 63            |

##### Guidelines International Network

| N | Search term                 | Search result |
|---|-----------------------------|---------------|
| 1 | "lung cancer"               | 41            |
| 2 | Needle Biopsy               | 2             |
| 3 | lung and nodule             | 1             |
| 4 | lung and mass               | 3             |
| 5 | hemoptysis                  | 2             |
| 6 | Removal of duplicated items | 48            |

##### Cochrane Library

| N | Search term                                         | Search result |
|---|-----------------------------------------------------|---------------|
| 1 | MeSH descriptor: [Lung Neoplasms] explode all trees | 6501          |



|    |                                                                                                 |        |
|----|-------------------------------------------------------------------------------------------------|--------|
| 2  | MeSH descriptor: [Biopsy, Needle] explode all trees                                             | 1130   |
| 3  | #1 and #2                                                                                       | 45     |
| 4  | (lung or pulmo* or thora*) and (nodule* or mass or tumo?r)                                      | 5760   |
| 5  | ((aspiration or needle or biopsy) and (percutaneous or diagnos*))                               | 10665  |
| 6  | #3 or (#4 and #5)                                                                               | 410    |
| 7  | (manage or observ* or hemoptysis or air embolism or hemothorax or pneumothorax or complication) | 330712 |
| 8  | #6 and #7                                                                                       | 304    |
| 9  | (guideline* or recommendation*) or (practice guideline or guideline)                            | 41616  |
| 10 | #8 and #9                                                                                       | 180    |
| 11 | Removal of duplicated items                                                                     | 180    |

### KoreaMED

| N | Search term                                         | Search result |
|---|-----------------------------------------------------|---------------|
| 1 | pulmonary [ALL] and mass [ALL] and guideline [ALL]  | 3             |
| 2 | pulmonary [ALL] and tumor [ALL] and guideline [ALL] | 1             |
| 3 | "lung cancer" [ALL] and guideline [ALL]             | 17            |
| 4 | Sum                                                 | 21            |
| 5 | Removal of duplicated items                         | 20            |

### KMBASE

|   |                                                 |    |
|---|-------------------------------------------------|----|
| 1 | [ALL=pulmonary nodule] AND [ALL=guideline]      | 4  |
| 2 | [ALL=pulmonary nodule] AND [ALL=recommendation] | 0  |
| 3 | [ALL=lung cancer] AND [ALL=guideline]           | 46 |
| 4 | Sum                                             | 50 |
| 5 | Removal of duplicated items                     | 49 |

### KoMGI

| N | Title of guideline                    | Year |
|---|---------------------------------------|------|
| 1 | * 폐암 진료지침                             | 2010 |
| 2 | * 저선량 CT를 이용한 폐암 검진 : 대한흉부영상의학회 의견 제안 | 2012 |
