# Supplementary material for: 2020 Clinical Practice Guideline for Percutaneous Transthoracic Needle Biopsy of Pulmonary Lesions: A Consensus Statement and Recommendations of the Korean Society of Thoracic Radiology
Source: PubMed Central journal article supplement — Korean J Radiol. 2020 Nov 19;22(2):263–80. doi: 10.3348/kjr.2020.0137 (PMC7817630; doi:10.3348/kjr.2020.0137), 2020-11-19
Supplement: kjr-22-263-s005.pdf [file kjr-22-263-s005.pdf]

**Supplemental Table 3. Summary of quality assessments of screened guidelines**

| Title                                                                                                                                                                           | Year | Overall quality      |                     | Recommendation       |                     | Final inclusion |
|---------------------------------------------------------------------------------------------------------------------------------------------------------------------------------|------|----------------------|---------------------|----------------------|---------------------|-----------------|
|                                                                                                                                                                                 |      | Mean K-AGREEII score | Number of reviewers | Mean K-AGREEII score | Number of reviewers |                 |
| <i>1) What are the indications for PTNB for lung lesions?</i>                                                                                                                   |      |                      |                     |                      |                     |                 |
| Guideline on Management of Solitary Pulmonary Nodule (1)                                                                                                                        | 2014 | 42                   | 4                   | 29                   | 4                   | No              |
| BTS guideline on the investigation and management of pulmonary nodules (2)                                                                                                      | 2015 | 85                   | 11                  | 96                   | 4                   | Yes             |
| SEOM clinical guidelines for the treatment of NSCLC (3)                                                                                                                         | 2015 | 25                   | 4                   | 4                    | 4                   | No              |
| Evaluation of Individuals With Pulmonary Nodules: When Is It Lung Cancer? Diagnosis and Management of Lung Cancer, 3rd ed: ACCP Evidence-Based Clinical Practice Guidelines (4) | 2013 | 83                   | 8                   | 79                   | 4                   | Yes             |
| Australian recommendations for EGFR T790M testing in advanced NSCLC (5)                                                                                                         | 2017 | 29                   | 8                   | 21                   | 4                   | No              |
| Guidelines for management of incidental pulmonary nodules detected on CT images From the Fleischner Society 2017 (6)                                                            | 2017 | 54                   | 4                   | 79                   | 4                   | Yes             |
| Establishing the Diagnosis of Lung Cancer, Diagnosis and Management of Lung Cancer, 3rd ed: ACCP Evidence-Based Clinical Practice Guidelines (7)                                | 2013 | 80                   | 11                  | 79                   | 4                   | Yes             |
| BTS guidelines for radiologically guided lung biopsy (8)                                                                                                                        | 2003 | 63                   | 14                  | 79                   | 4                   | Yes             |
| Special Treatment Issues in Non-small Cell Lung Cancer: Diagnosis and Management of Lung Cancer, 3rd ed: ACCP Evidence-Based Clinical Practice Guidelines (9)                   | 2013 | 71                   | 4                   | 54                   | 4                   | Yes             |
| Executive Summary: Diagnosis and Management of Lung Cancer, 3rd ed: ACCP Evidence-Based Clinical Practice Guidelines (10)                                                       | 2013 | 52                   | 14                  | 71                   | 4                   | Yes             |
| Small Cell and Non-Small Cell Lung Cancer: Diagnosis, Treatment and Follow-up (KCE)(11)                                                                                         | 2013 | 47                   | 11                  | 79                   | 4                   | No              |
| Lung cancer: diagnosis and management, CG121 (NICE)(12)                                                                                                                         | 2011 | 67                   | 11                  | 79                   | 4                   | Yes             |
| Management of lung cancer: A national clinical guideline (SIGN)(13)                                                                                                             | 2014 | 83                   | 8                   | 79                   | 4                   | Yes             |

|                                                                                                                                                                                       |      |    |    |     |   |     |
|---------------------------------------------------------------------------------------------------------------------------------------------------------------------------------------|------|----|----|-----|---|-----|
| Guideline Recommendations for EGFR Mutation Testing in Lung Cancer (14)                                                                                                               | 2013 | 29 | 4  | 29  | 4 | No  |
| Evidence-based best practices for EGFR T790M testing in lung cancer in Canada (15)                                                                                                    | 2018 | 29 | 4  | 21  | 4 | No  |
| Molecular Testing Guideline for the Selection of Patients With Lung Cancer for Treatment With Targeted Tyrosine Kinase Inhibitors (16)                                                | 2018 | 75 | 4  | 46  | 4 | No  |
| Metastatic non-small-cell lung cancer, consensus on pathology and molecular tests, first-line, second-line, and third-line therapy, 1st ESMO Consensus Conference in Lung Cancer (17) | 2011 | 50 | 4  | 46  | 4 | No  |
| Small-cell lung cancer (SCLC), ESMO Clinical Practice Guidelines for diagnosis, treatment and follow-up (18)                                                                          | 2013 | 46 | 4  | 29  | 4 | No  |
| 2nd ESMO Consensus Conference on Lung Cancer, non-small-cell lung cancer first-line, second and further lines of treatment in advanced disease (19)                                   | 2014 | 54 | 4  | 46  | 4 | No  |
| 2nd ESMO consensus conference on lung cancer, pathology and molecular biomarkers for non-small-cell lung cancer (20)                                                                  | 2014 | 46 | 8  | 46  | 4 | No  |
| 2nd ESMO Consensus Guidelines, Early stage non-small cell lung cancer consensus on diagnosis, treatment and follow-up (21)                                                            | 2014 | 50 | 4  | 42  | 4 | No  |
| Early-Stage and Locally Advanced (non-metastatic) Non-Small-Cell Lung Cancer, ESMO Clinical Practice Guidelines (22)                                                                  | 2017 | 46 | 8  | 54  | 4 | No  |
| Metastatic non-small cell lung cancer: ESMO Clinical Practice Guidelines for diagnosis, treatment and follow-up (23)                                                                  | 2018 | 50 | 8  | 63  | 4 | Yes |
| Invasive Staging: the guidelines (24)                                                                                                                                                 | 2003 | 58 | 8  | 79  | 4 | Yes |
| ACR Appropriateness Criteria® Radiologic Management of Thoracic Nodules and Masses (25)                                                                                               | 2012 | 45 | 11 | 71  | 4 | No  |
| <b>2) What is the appropriate laboratory and imaging evaluation for patients before PTNB?</b>                                                                                         |      |    |    |     |   |     |
| Executive Summary: Diagnosis and Management of Lung Cancer, 3rd ed: ACCP Evidence-Based Clinical Practice Guidelines                                                                  | 2013 | 52 | 14 | 0   | 3 | No  |
| Lung cancer: diagnosis and management, CG121 (NICE)(12)                                                                                                                               | 2011 | 67 | 11 | 11  | 3 | No  |
| Small Cell and Non-Small Cell Lung Cancer: Diagnosis, Treatment and Follow-up (KCE)(11)                                                                                               | 2013 | 47 | 11 | 0   | 3 | No  |
| BTS guidelines for radiologically guided lung biopsy (8)                                                                                                                              | 2003 | 63 | 3  | 100 | 3 | Yes |
| <b>3) What are the appropriate techniques for PTNB of lung lesions?</b>                                                                                                               |      |    |    |     |   |     |
| Diagnosis of Lung Cancer: the guidelines (26)                                                                                                                                         | 2003 | 54 | 4  | 42  | 4 | No  |

|                                                                                                                                                                                 |      |    |    |    |   |     |
|---------------------------------------------------------------------------------------------------------------------------------------------------------------------------------|------|----|----|----|---|-----|
| Establishing the Diagnosis of Lung Cancer, Diagnosis and Management of Lung Cancer, 3rd ed: ACCP Evidence-Based Clinical Practice Guidelines (7)                                | 2013 | 80 | 11 | 75 | 4 | Yes |
| Invasive Staging: the guidelines (24)                                                                                                                                           | 2003 | 58 | 8  | 46 | 4 | No  |
| Lung cancer: diagnosis and management, CG121 (NICE)(12)                                                                                                                         | 2011 | 67 | 11 | 88 | 4 | Yes |
| Small Cell and Non-Small Cell Lung Cancer: Diagnosis, Treatment and Follow-up (KCE)(11)                                                                                         | 2013 | 47 | 11 | 25 | 4 | No  |
| BTS guidelines for radiologically guided lung biopsy (8)                                                                                                                        | 2003 | 63 | 14 | 67 | 4 | Yes |
| Management of lung cancer: A national clinical guideline (SIGN)(13)                                                                                                             | 2014 | 83 | 8  | 58 | 4 | Yes |
| Executive Summary Diagnosis and Management of Lung Cancer, 3rd ed: ACCP Evidence-Based Clinical Practice Guidelines (10)                                                        | 2013 | 52 | 14 | 63 | 4 | Yes |
| BTS guidelines for the investigation and management of pulmonary nodules (2)                                                                                                    | 2015 | 85 | 11 | 79 | 4 | Yes |
| Early and locally advanced NSCLC: ESMO Clinical Practice Guidelines for diagnosis, treatment and follow-up (22)                                                                 | 2017 | 46 | 8  | 25 | 4 | No  |
| Metastatic non-small cell lung cancer: ESMO Clinical Practice Guidelines for diagnosis, treatment and follow-up (23)                                                            | 2018 | 50 | 8  | 38 | 4 | No  |
| Second ESMO consensus conference on lung cancer: pathology and molecular biomarkers for non-small-cell lung cancer (20)                                                         | 2014 | 46 | 8  | 29 | 4 | No  |
| Evaluation of Individuals With Pulmonary Nodules: When Is It Lung Cancer? Diagnosis and Management of Lung Cancer, 3rd ed: ACCP Evidence-Based Clinical Practice Guidelines (4) | 2013 | 83 | 8  | 75 | 4 | Yes |
| ACR Appropriateness Criteria® Radiologic Management of Thoracic Nodules and Masses (25)                                                                                         | 2012 | 45 | 11 | 58 | 4 | No  |
| Australian recommendations for EGFR T790M testing in advanced NSCLC (5)                                                                                                         | 2017 | 29 | 8  | 25 | 4 | No  |
| <b>4) What is the appropriate management of acute PTNB-related complications?</b>                                                                                               |      |    |    |    |   |     |
| BTS guidelines for radiologically guided lung biopsy (8)                                                                                                                        | 2003 | 63 | 14 | 67 | 3 | Yes |
| ACR Appropriateness Criteria®Radiologic Management of Thoracic Nodules and Masses (25)                                                                                          | 2012 | 45 | 11 | 22 | 3 | No  |
| Executive Summary Diagnosis and Management of Lung Cancer, 3rd ed: ACCP Evidence-Based Clinical Practice Guidelines (10)                                                        | 2013 | 52 | 14 | 56 | 3 | Yes |
| Establishing the Diagnosis of Lung Cancer, Diagnosis and Management of Lung Cancer, 3rd ed: ACCP Evidence-Based Clinical Practice Guidelines (7)                                | 2013 | 80 | 11 | 72 | 3 | Yes |
| BTS guidelines for the investigation and management of pulmonary nodules (2)                                                                                                    | 2015 | 85 | 11 | 78 | 3 | Yes |

|                                                                                                        |      |    |   |    |   |    |
|--------------------------------------------------------------------------------------------------------|------|----|---|----|---|----|
| Management of Spontaneous Pneumothorax and Postinterventional Pneumothorax<br>German S3-guideline (27) | 2018 | 39 | 3 | 61 | 3 | No |
|--------------------------------------------------------------------------------------------------------|------|----|---|----|---|----|

---

Abbreviation: ACCP=American College of Chest Physicians; ACR=American College of Radiology; BTS=British Thoracic Society; ESMO=European Society for Medical Oncology; KCE= Belgian Health Care Knowledge Centre; NICE=National Institute for Health and Clinical Excellence; NSCLC=Non-small cell lung cancer; SEOM=Sociedad Española de Oncología Médica; SIGN=Scottish Intercollegiate Guidelines Network. The number in the parenthesis indicates the number of reference in this supplemental document.

## References

1. Alvarez Martinez CJ, Bastarrika Aleman G, Disdier Vicente C, Fernandez Villar A, Hernandez Hernandez JR, Maldonado Suarez A et al. Guideline on management of solitary pulmonary nodule. Arch Bronconeumol 2014;50:285-293
2. Callister ME, Baldwin DR, Akram AR, Barnard S, Cane P, Draffan J et al. British thoracic society guidelines for the investigation and management of pulmonary nodules. Thorax 2015;70 Suppl 2:ii1-ii54
3. Garcia-Campelo R, Bernabe R, Cobo M, Corral J, Coves J, Domine M et al. Seom clinical guidelines for the treatment of non-small cell lung cancer (nslc) 2015. Clin Transl Oncol 2015;17:1020-1029
4. Gould MK, Donington J, Lynch WR, Mazzone PJ, Midthun DE, Naidich DP et al. Evaluation of individuals with pulmonary nodules: When is it lung cancer? Diagnosis and management of lung cancer, 3rd ed: American college of chest physicians evidence-based clinical practice guidelines. Chest 2013;143:e93S-e120S
5. John T, Bowden JJ, Clarke S, Fox SB, Garrett K, Horwood K et al. Australian recommendations for egfr t790m testing in advanced non-small cell lung cancer. Asia Pac J Clin Oncol 2017;13:296-303
6. MacMahon H, Naidich DP, Goo JM, Lee KS, Leung ANC, Mayo JR et al. Guidelines for management of incidental pulmonary nodules detected on ct images: From the fleischner society 2017. Radiology 2017;284:228-243
7. Rivera MP, Mehta AC, Wahidi MM. Establishing the diagnosis of lung cancer: Diagnosis and management of lung cancer, 3rd ed:

American college of chest physicians evidence-based clinical practice guidelines. Chest 2013;143:e142S-e165S

8. Manhire A, Charig M, Clelland C, Gleeson F, Miller R, Moss H et al. Guidelines for radiologically guided lung biopsy. Thorax 2003;58:920-936
9. Kozower BD, Larnar JM, Detterbeck FC, Jones DR. Special treatment issues in non-small cell lung cancer: Diagnosis and management of lung cancer, 3rd ed: American college of chest physicians evidence-based clinical practice guidelines. Chest 2013;143:e369S-e399S
10. Detterbeck FC, Lewis SZ, Diekemper R, Addrizzo-Harris D, Alberts WM. Executive summary: Diagnosis and management of lung cancer, 3rd ed: American college of chest physicians evidence-based clinical practice guidelines. Chest 2013;143:7S-37S
11. Centre BHCK. Small cell and non-small cell lung cancer: Diagnosis, treatment and follow-up (kce). 2013:[https://kce.fgov.be/sites/default/files/atoms/files/KCE\\_206\\_lung\\_cancer.pdf](https://kce.fgov.be/sites/default/files/atoms/files/KCE_206_lung_cancer.pdf)
12. Excellence NIfHaC. Lung cancer: Diagnosis and management (nice guideline 121). 2011:<https://www.nice.org.uk/guidance/cg121>
13. Network SIG. Sign 137 management of lung cancer. 2014
14. Shim HS, Chung JH, Kim L, Chang S, Kim WS, Lee GK et al. Guideline recommendations for egfr mutation testing in lung cancer: Proposal of the korean cardiopulmonary pathology study group. Korean J Pathol 2013;47:100-106
15. Stockley T, Souza CA, Cheema PK, Melosky B, Kamel-Reid S, Tsao MS et al. Evidence-based best practices for egfr t790m testing in lung cancer in canada. Curr Oncol 2018;25:163-169

16. Kalemkerian GP, Narula N, Kennedy EB, Biermann WA, Donington J, Leighl NB et al. Molecular testing guideline for the selection of patients with lung cancer for treatment with targeted tyrosine kinase inhibitors: American society of clinical oncology endorsement of the college of american pathologists/international association for the study of lung cancer/association for molecular pathology clinical practice guideline update. *J Clin Oncol* 2018;36:911-919
17. Felip E, Gridelli C, Baas P, Rosell R, Stahel R, Panel M. Metastatic non-small-cell lung cancer: Consensus on pathology and molecular tests, first-line, second-line, and third-line therapy: 1st esmo consensus conference in lung cancer; lugano 2010. *Ann Oncol* 2011;22:1507-1519
18. Fruh M, De Ruyscher D, Popat S, Crino L, Peters S, Felip E et al. Small-cell lung cancer (sclc): Esmo clinical practice guidelines for diagnosis, treatment and follow-up. *Ann Oncol* 2013;24 Suppl 6:vi99-105
19. Besse B, Adjei A, Baas P, Meldgaard P, Nicolson M, Paz-Ares L et al. 2nd esmo consensus conference on lung cancer: Non-small-cell lung cancer first-line/second and further lines of treatment in advanced disease. *Ann Oncol* 2014;25:1475-1484
20. Kerr KM, Bubendorf L, Edelman MJ, Marchetti A, Mok T, Novello S et al. Second esmo consensus conference on lung cancer: Pathology and molecular biomarkers for non-small-cell lung cancer. *Ann Oncol* 2014;25:1681-1690
21. Vansteenkiste J, Crino L, Doooms C, Douillard JY, Faivre-Finn C, Lim E et al. 2nd esmo consensus conference on lung cancer: Early-stage non-small-cell lung cancer consensus on diagnosis, treatment and follow-up. *Ann Oncol* 2014;25:1462-1474
22. Postmus PE, Kerr KM, Oudkerk M, Senan S, Waller DA, Vansteenkiste J et al. Early and locally advanced non-small-cell lung cancer

(nsccl): Esmo clinical practice guidelines for diagnosis, treatment and follow-up. Ann Oncol 2017;28:iv1-iv21

23. Planchard D, Popat S, Kerr K, Novello S, Smit EF, Faivre-Finn C et al. Metastatic non-small cell lung cancer: Esmo clinical practice guidelines for diagnosis, treatment and follow-up. Ann Oncol 2018;29:iv192-iv237

24. Detterbeck FC, DeCamp MM, Jr., Kohman LJ, Silvestri GA, American College of Chest P. Lung cancer. Invasive staging: The guidelines. Chest 2003;123:167S-175S

25. Ray CE, Jr., English B, Funaki BS, Burke CT, Fidelman N, Ginsburg ME et al. Acr appropriateness criteria(r) radiologic management of thoracic nodules and masses. J Am Coll Radiol 2012;9:13-19

26. Rivera MP, Detterbeck F, Mehta AC, American College of Chest P. Diagnosis of lung cancer: The guidelines. Chest 2003;123:129S-136S

27. Schnell J, Beer M, Eggeling S, Gesierich W, Gottlieb J, Herth F et al. Management of spontaneous pneumothorax and postinterventional pneumothorax: German s3-guideline. Zentralbl Chir 2018;143:S12-S43
